# Supplementary material for: Association between periodontal disease and osteoporosis in postmenopausal women: a protocol for systematic review and meta-analysis
Source: HighWire-hosted journal article supplement (doi:10.1136/bmjopen-2021-049277), 2021-09-01
Supplement: bmjopen-2021-049277supp001_data_supplement.pdf [file bmjopen-2021-049277supp001_data_supplement.pdf]

Table S1 Full search strategies

| Databases             | Strategies                                                                                                                                                                                                                                                                                                                                                                                                                                                                                                                                                                                                                                                                                                                                                                                                                                                                                                                                                                                                                                                                                                                                                                                                                                                                                                                                                       |
|-----------------------|------------------------------------------------------------------------------------------------------------------------------------------------------------------------------------------------------------------------------------------------------------------------------------------------------------------------------------------------------------------------------------------------------------------------------------------------------------------------------------------------------------------------------------------------------------------------------------------------------------------------------------------------------------------------------------------------------------------------------------------------------------------------------------------------------------------------------------------------------------------------------------------------------------------------------------------------------------------------------------------------------------------------------------------------------------------------------------------------------------------------------------------------------------------------------------------------------------------------------------------------------------------------------------------------------------------------------------------------------------------|
| <b>Embase</b>         | <ol style="list-style-type: none"> <li>1. Perimenopausal Bone Loss.ab,kw,ti.</li> <li>2. Perimenopausal Bone Losses.ab,kw,ti.</li> <li>3. Postmenopausal Bone Loss.ab,kw,ti.</li> <li>4. Postmenopausal Bone Losses.ab,kw,ti.</li> <li>5. Postmenopausal Osteoporoses.ab,kw,ti.</li> <li>6. Post-Menopausal Osteoporoses.ab,kw,ti.</li> <li>7. Postmenopausal Osteoporosis.ab,kw,ti.</li> <li>8. Post-Menopausal Osteoporosis.ab,kw,ti.</li> <li>9. Osteoporosis, Postmenopausal.ab,kw,ti.</li> <li>10. exp postmenopause osteoporosis/</li> <li>11. 1 or 2 or 3 or 4 or 5 or 6 or 7 or 8 or 9 or 10</li> <li>12. Parodontoses.ab,kw,ti.</li> <li>13. Parodontosis.ab,kw,ti.</li> <li>14. Periodontal Disease.ab,kw,ti.</li> <li>15. Periodontal Diseases.ab,kw,ti.</li> <li>16. Pyorrhea Alveolaris.ab,kw,ti.</li> <li>17. exp periodontal disease/</li> <li>18. 12 or 13 or 14 or 15 or 16 or 17</li> <li>19. 11 and 18</li> </ol>                                                                                                                                                                                                                                                                                                                                                                                                                             |
| <b>Medline/PubMed</b> | <ol style="list-style-type: none"> <li>1 "Periodontal Diseases"[Mesh]</li> <li>2 (((((Parodontoses[Title/Abstract])) OR (Parodontosis[Title/Abstract])) OR (Periodontal Disease[Title/Abstract])) OR (Periodontal Diseases[Title/Abstract])) OR (Pyorrhea Alveolaris[Title/Abstract]))</li> <li>3 ("Periodontal Diseases"[Mesh]) OR (((((Parodontoses[Title/Abstract])) OR (Parodontosis[Title/Abstract])) OR (Periodontal Disease[Title/Abstract])) OR (Periodontal Diseases[Title/Abstract])) OR (Pyorrhea Alveolaris[Title/Abstract]))</li> <li>4 "Osteoporosis, Postmenopausal"[Mesh]</li> <li>5 (((((((Perimenopausal Bone Loss[Title/Abstract]) OR (Perimenopausal Bone Losses[Title/Abstract])) OR (Postmenopausal Bone Loss[Title/Abstract])) OR (Postmenopausal Bone Losses[Title/Abstract])) OR (Postmenopausal Osteoporoses[Title/Abstract])) OR (Post-Menopausal Osteoporoses[Title/Abstract])) OR (Postmenopausal Osteoporosis[Title/Abstract])) OR (Post-Menopausal Osteoporosis[Title/Abstract]))</li> <li>6 (((((((Perimenopausal Bone Loss[Title/Abstract]) OR (Perimenopausal Bone Losses[Title/Abstract])) OR (Postmenopausal Bone Loss[Title/Abstract])) OR (Postmenopausal Bone Losses[Title/Abstract])) OR (Postmenopausal Osteoporoses[Title/Abstract])) OR (Post-Menopausal Osteoporoses[Title/Abstract])) OR (Postmenopausal</li> </ol> |

|                                                                 |                                                                                                                                                                                                                                                                                                                                                                                                                                                                                                                                                                                                                                                                                                                                                                                                                                                                                                              |
|-----------------------------------------------------------------|--------------------------------------------------------------------------------------------------------------------------------------------------------------------------------------------------------------------------------------------------------------------------------------------------------------------------------------------------------------------------------------------------------------------------------------------------------------------------------------------------------------------------------------------------------------------------------------------------------------------------------------------------------------------------------------------------------------------------------------------------------------------------------------------------------------------------------------------------------------------------------------------------------------|
|                                                                 | <p>Osteoporosis[Title/Abstract])) OR (Post-Menopausal Osteoporosis[Title/Abstract])) OR ("Osteoporosis, Postmenopausal"[Mesh])</p> <p>7 (((((((((Perimenopausal Bone Loss[Title/Abstract]) OR (Perimenopausal Bone Losses[Title/Abstract])) OR (Postmenopausal Bone Loss[Title/Abstract])) OR (Postmenopausal Bone Losses[Title/Abstract])) OR (Postmenopausal Osteoporoses[Title/Abstract])) OR (Post-Menopausal Osteoporoses[Title/Abstract])) OR (Postmenopausal Osteoporosis[Title/Abstract])) OR (Post-Menopausal Osteoporosis[Title/Abstract])) OR ("Osteoporosis, Postmenopausal"[Mesh]))</p> <p>AND (("Periodontal Diseases"[Mesh]) OR ((((((Parodontoses[Title/Abstract])) OR (Parodontosis[Title/Abstract])) OR (Periodontal Disease[Title/Abstract])) OR (Periodontal Diseases[Title/Abstract])) OR (Pyorrhea Alveolaris[Title/Abstract]))))</p>                                                  |
| <b>Cochrane Central Register of Controlled Trials (CENTRAL)</b> | <p>#1 MeSH descriptor: [Osteoporosis, Postmenopausal] explode all trees</p> <p>#2 ("perimenopausal bone loss"):ti,ab,kw OR (Perimenopausal Bone Losses):ti,ab,kw OR (Postmenopausal Bone Loss):ti,ab,kw OR (Postmenopausal Bone Losses):ti,ab,kw OR (Postmenopausal Osteoporoses):ti,ab,kw (Word variations have been searched)</p> <p>#3 (Post-Menopausal Osteoporoses):ti,ab,kw OR (Postmenopausal Osteoporosis):ti,ab,kw OR (Post-Menopausal Osteoporosis):ti,ab,kw OR (Osteoporosis, Postmenopausal):ti,ab,kw (Word variations have been searched) 5163</p> <p>#4 #1 OR #2 OR #3</p> <p>#5 MeSH descriptor: [Periodontal Diseases] explode all trees</p> <p>#6 (Parodontoses):ti,ab,kw OR (Parodontosis):ti,ab,kw OR (Periodontal Disease):ti,ab,kw OR (Periodontal Diseases):ti,ab,kw OR (Pyorrhea Alveolaris):ti,ab,kw (Word variations have been searched)</p> <p>#7 #5 OR #6</p> <p>#8 #4 AND #7</p> |
| <b>Web of Science (All Databases)</b>                           | <p>1. Perimenopausal Bone Loss (Topic) or Perimenopausal Bone Losses (Topic) or Postmenopausal Bone Loss (Topic) or Postmenopausal Bone Losses (Topic) or Postmenopausal Osteoporoses (Topic) or Post-Menopausal Osteoporoses (Topic) or Postmenopausal Osteoporosis (Topic) or Post-Menopausal Osteoporosis (Topic) or Osteoporosis, Postmenopausal (Topic)</p> <p>2. Parodontoses (Topic) or Parodontosis (Topic) or Periodontal Disease (Topic) or Periodontal Diseases (Topic) or Pyorrhea Alveolaris (Topic)</p> <p>3. (#2) AND #1</p>                                                                                                                                                                                                                                                                                                                                                                  |
| <b>Scopus</b>                                                   | <p>1. ( TITLE-ABS-KEY ( parodontoses ) OR TITLE-ABS-KEY ( parodontosis ) OR TITLE-ABS-KEY ( periodontal AND disease ) OR TITLE-ABS-KEY ( periodontal AND diseases ) OR TITLE-ABS-KEY ( pyorrhea AND alveolaris ) )</p> <p>2. ( TITLE-ABS-KEY ( perimenopausal AND bone AND loss ) OR TITLE-ABS-KEY ( perimenopausal AND bone AND losses ) OR</p>                                                                                                                                                                                                                                                                                                                                                                                                                                                                                                                                                             |

|  |                                                                                                                                                                                                                                                                                                                                                                                                                                                                                                                                                                                                                                                                                                                                                                                                                                                                                                                                                                                                                                                                                                                                                                                                                  |
|--|------------------------------------------------------------------------------------------------------------------------------------------------------------------------------------------------------------------------------------------------------------------------------------------------------------------------------------------------------------------------------------------------------------------------------------------------------------------------------------------------------------------------------------------------------------------------------------------------------------------------------------------------------------------------------------------------------------------------------------------------------------------------------------------------------------------------------------------------------------------------------------------------------------------------------------------------------------------------------------------------------------------------------------------------------------------------------------------------------------------------------------------------------------------------------------------------------------------|
|  | <p>TITLE-ABS-KEY ( postmenopausal AND bone AND loss ) OR<br/>TITLE-ABS-KEY ( postmenopausal AND bone AND losses ) OR<br/>TITLE-ABS-KEY ( postmenopausal AND osteoporoses ) OR<br/>TITLE-ABS-KEY ( post-menopausal AND osteoporoses ) OR<br/>TITLE-ABS-KEY ( postmenopausal AND osteoporosis ) OR<br/>TITLE-ABS-KEY ( post-menopausal AND osteoporosis ) OR<br/>TITLE-ABS-KEY ( osteoporosis, AND postmenopausal ) )<br/>3. ( ( TITLE-ABS-KEY ( perimenopausal AND bone AND loss ) OR<br/>TITLE-ABS-KEY ( perimenopausal AND bone AND losses ) OR<br/>TITLE-ABS-KEY ( postmenopausal AND bone AND loss ) OR<br/>TITLE-ABS-KEY ( postmenopausal AND bone AND losses ) OR<br/>TITLE-ABS-KEY ( postmenopausal AND osteoporoses ) OR<br/>TITLE-ABS-KEY ( post-menopausal AND osteoporoses ) OR<br/>TITLE-ABS-KEY ( postmenopausal AND osteoporosis ) OR<br/>TITLE-ABS-KEY ( post-menopausal AND osteoporosis ) OR<br/>TITLE-ABS-KEY ( osteoporosis, AND postmenopausal ) ) ) AND<br/>( ( TITLE-ABS-KEY ( parodontoses ) OR TITLE-ABS-KEY<br/>( parodontosis ) OR TITLE-ABS-KEY ( periodontal AND disease )<br/>OR TITLE-ABS-KEY ( periodontal AND diseases ) OR<br/>TITLE-ABS-KEY ( pyorrhea AND alveolaris ) ) )</p> |
|--|------------------------------------------------------------------------------------------------------------------------------------------------------------------------------------------------------------------------------------------------------------------------------------------------------------------------------------------------------------------------------------------------------------------------------------------------------------------------------------------------------------------------------------------------------------------------------------------------------------------------------------------------------------------------------------------------------------------------------------------------------------------------------------------------------------------------------------------------------------------------------------------------------------------------------------------------------------------------------------------------------------------------------------------------------------------------------------------------------------------------------------------------------------------------------------------------------------------|
